# Supplementary material for: Effects of progessive vs. constant protocol whole-body vibration on muscle activation, pain, disability and functional performance in non-specific chronic low back pain patients: a randomized clinical trial
Source: PeerJ. 2024 Oct 24;12:e18390. doi: 10.7717/peerj.18390 (PMC11512803; doi:10.7717/peerj.18390)
Supplement: Supplemental Information 1 [file peerj-12-18390-s001.xlsx]

## Sheet: spss data
Group	Age	Gender	Height	Weight	BMI	VAS1	VAS2	RMDQ1	RMDQ2	PILE1	PILE2	RAavgRMS1	RAavgRMS2	RAavgMVIC1	RAavgMVIC2	RA%MVIC1	RA%MVIC2	EOavgRMS1	EOavgRMS2	EOavgMVIC1	EOavgMVIC2	EO%MVIC1	EO%MVIC2	ESavgRMS1	ESavgRMS2	ESavgMVIC1	ESavgMVIC2	ES%MVIC1	ES%MVIC2	MFavgRMS1	MFavgRMS2	MFavgMVIC1	MFavgMVIC2	MF%MVIC1	MF%MVIC2
1	46	1	1.74	57	18.8268	6	2	8	4	12.5	15	0.04	0.054	0.048	0.052	0.8749	1.0449	0.049	0.065	0.034	0.041	1.4412	1.5774	0.053	0.062	0.065	0.067	0.8154	0.9254	0.038	0.045	0.061	0.054	0.6264	0.8211
1	40	1	1.75	76	24.8163	5	1	9	5	12.5	15	0.06	0.074	0.065	0.07	0.9949	1.0614	0.048	0.063	0.058	0.061	0.8276	1.0352	0.049	0.064	0.054	0.058	0.9074	1.1034	0.037	0.048	0.037	0.043	1	1.1055
1	31	2	1.524	42	18.0834	3	1	6	3	10	12.5	0.04	0.057	0.04	0.056	0.9531	1.025	0.045	0.061	0.021	0.043	2.1429	1.44	0.048	0.061	0.051	0.057	0.9412	1.0702	0.03	0.048	0.041	0.046	0.7256	1.044
1	42	1	1.778	61	19.296	5	2	9	4	15	15	0.05	0.068	0.06	0.064	0.8975	1.067	0.06	0.073	0.043	0.049	1.3953	1.4932	0.085	0.102	0.092	0.098	0.9239	1.0398	0.069	0.089	0.082	0.088	0.8327	1.0209
1	55	1	1.74	68	22.46	6	3	7	3	12.5	12.5	0.05	0.057	0.043	0.054	1.1244	1.0496	0.046	0.057	0.024	0.037	1.9492	1.5283	0.06	0.069	0.052	0.056	1.1538	1.2321	0.053	0.062	0.049	0.053	1.0736	1.1725
1	35	2	1.62	60	22.8624	6	4	9	5	10	12.5	0.05	0.039	0.06	0.039	0.785	0.9847	0.05	0.054	0.035	0.058	1.4286	0.9312	0.041	0.048	0.037	0.041	1.1081	1.1707	0.029	0.045	0.025	0.037	1.1361	1.2218
1	44	1	1.77	65	20.7476	7	3	5	3	15	15	0.05	0.058	0.043	0.048	1.0868	1.2083	0.069	0.101	0.035	0.081	1.9714	1.2423	0.026	0.041	0.029	0.039	0.8966	1.0513	0.019	0.029	0.025	0.032	0.751	0.9177
1	34	2	1.616	48	18.3806	6	1	8	3	10	12.5	0.04	0.054	0.05	0.059	0.6962	0.9084	0.047	0.069	0.058	0.061	0.8103	1.1233	0.054	0.067	0.05	0.057	1.08	1.1754	0.049	0.06	0.043	0.047	1.1257	1.2814
1	48	2	1.549	58	24.1727	6	2	13	7	7.5	10	0.03	0.043	0.04	0.048	0.838	0.9144	0.038	0.047	0.021	0.032	1.8095	1.4974	0.036	0.048	0.037	0.044	0.973	1.0909	0.049	0.065	0.054	0.058	0.9124	1.1195
1	39	1	1.79	72	22.4712	4	1	10	5	12.5	12.5	0.06	0.079	0.073	0.074	0.8532	1.0721	0.049	0.072	0.043	0.055	1.1395	1.3025	0.053	0.072	0.065	0.067	0.8154	1.0746	0.038	0.055	0.061	0.064	0.6264	0.8489
1	54	2	1.56	54	22.1893	5	2	9	5	10	12.5	0.03	0.043	0.035	0.046	0.9905	0.9506	0.028	0.052	0.034	0.038	0.8235	1.362	0.049	0.062	0.054	0.06	0.9074	1.0333	0.037	0.048	0.037	0.043	1	1.1055
1	36	1	1.77	65	20.7476	4	0	9	4	15	17.5	0.04	0.057	0.044	0.061	0.853	0.9409	0.045	0.065	0.043	0.053	1.0465	1.2419	0.048	0.062	0.051	0.056	0.9412	1.1071	0.03	0.048	0.041	0.046	0.7256	1.044
1	49	2	1.65	52	19.1001	6	2	6	3	10	12.5	0.05	0.067	0.06	0.064	0.8975	1.0514	0.065	0.081	0.041	0.049	1.5854	1.656	0.035	0.058	0.046	0.051	0.7609	1.1373	0.069	0.074	0.082	0.085	0.8327	0.8783
1	33	2	1.53	54	23.0681	3	0	7	4	12.5	15	0.04	0.057	0.033	0.054	1.162	1.0496	0.046	0.067	0.035	0.042	1.3143	1.6032	0.06	0.069	0.052	0.057	1.1538	1.2105	0.053	0.065	0.049	0.056	1.0736	1.1604
1	45	1	1.66	54	19.5965	7	3	8	4	7.5	10	0.05	0.058	0.043	0.046	1.0868	1.2742	0.05	0.064	0.035	0.042	1.4286	1.5292	0.041	0.054	0.037	0.045	1.1081	1.2	0.029	0.04	0.025	0.032	1.1361	1.2568
1	32	2	1.49	54	24.3232	5	3	12	8	10	12.5	0.05	0.063	0.035	0.042	1.3714	1.5218	0.028	0.042	0.034	0.037	0.8235	1.1287	0.026	0.046	0.029	0.039	0.8966	1.1795	0.037	0.048	0.037	0.041	1	1.1595
2	31	2	1.499	40	17.8015	6	3	14	9	12.5	12.5	0.04	0.049	0.038	0.046	0.9458	1.0681	0.038	0.06	0.034	0.04	1.1176	1.4996	0.054	0.067	0.05	0.058	1.08	1.1552	0.038	0.058	0.061	0.066	0.6264	0.8741
2	32	2	1.524	42	18.0834	4	1	8	3	10	12.5	0.05	0.066	0.049	0.056	1.0567	1.1729	0.046	0.061	0.058	0.061	0.7931	1.0138	0.036	0.048	0.037	0.047	0.973	1.0213	0.037	0.046	0.037	0.042	1	1.1136
2	51	1	1.616	62	23.7415	3	0	10	4	10	12.5	0.03	0.034	0.029	0.037	0.8607	0.9135	0.048	0.06	0.038	0.042	1.2632	1.4079	0.053	0.052	0.065	0.067	0.8154	0.7761	0.03	0.047	0.041	0.046	0.7256	1.0115
2	46	2	1.702	59	20.3673	7	4	10	5	10	10	0.06	0.066	0.047	0.054	1.171	1.2255	0.042	0.057	0.043	0.05	0.9767	1.1328	0.049	0.047	0.054	0.057	0.9074	0.8246	0.069	0.071	0.082	0.082	0.8327	0.8641
2	37	1	1.702	56	19.3316	4	1	13	8	7.5	10	0.04	0.046	0.035	0.042	1.0086	1.097	0.027	0.045	0.016	0.029	1.6875	1.5484	0.048	0.061	0.051	0.054	0.9412	1.1296	0.053	0.063	0.048	0.055	1.0878	1.1447
2	39	1	1.54	55	23.1911	7	2	10	5	10	12.5	0.04	0.068	0.036	0.048	1.21	1.4066	0.06	0.075	0.045	0.052	1.3333	1.4562	0.085	0.088	0.092	0.081	0.9239	1.0864	0.029	0.037	0.025	0.03	1.1361	1.2075
2	45	2	1.65	58	21.3039	7	3	8	4	15	17.5	0.06	0.07	0.059	0.06	1.0471	1.1544	0.046	0.054	0.045	0.048	1.0222	1.1143	0.06	0.074	0.052	0.061	1.1538	1.2131	0.019	0.037	0.025	0.033	0.751	1.1088
2	33	2	1.524	51	21.9584	5	2	11	6	7.5	10	0.03	0.034	0.033	0.039	0.771	0.8638	0.049	0.066	0.058	0.061	0.8448	1.0904	0.041	0.057	0.037	0.046	1.1081	1.2391	0.049	0.058	0.043	0.049	1.1257	1.1932
2	39	1	1.64	66	24.539	5	1	8	3	10	12.5	0.05	0.054	0.039	0.042	1.175	1.2775	0.048	0.054	0.031	0.039	1.5484	1.3673	0.049	0.063	0.054	0.057	0.9074	1.1053	0.049	0.057	0.054	0.055	0.9124	1.0277
2	32	2	1.701	55	19.0088	7	5	10	4	10	12.5	0.03	0.039	0.026	0.037	1.0166	1.0697	0.035	0.04	0.043	0.038	0.814	1.052	0.043	0.057	0.045	0.053	0.9556	1.0755	0.038	0.049	0.061	0.067	0.6264	0.7242
2	49	2	1.56	54	22.1893	5	3	7	3	12.5	15	0.05	0.059	0.058	0.061	0.8893	0.9694	0.038	0.07	0.034	0.056	1.1176	1.2499	0.062	0.069	0.074	0.06	0.8378	1.15	0.039	0.058	0.037	0.05	1.0541	1.1595
2	36	2	1.68	59	20.9042	6	2	9	3	15	15	0.05	0.065	0.049	0.055	1.0567	1.1829	0.042	0.057	0.041	0.049	1.0244	1.1557	0.03	0.052	0.031	0.046	0.9677	1.1255	0.03	0.046	0.041	0.042	0.7256	1.1136
2	43	1	1.52	50	21.6413	3	0	6	1	12.5	12.5	0.05	0.054	0.039	0.041	1.175	1.3084	0.065	0.074	0.041	0.045	1.5854	1.6283	0.043	0.062	0.044	0.056	0.9773	1.1071	0.069	0.077	0.084	0.086	0.813	0.8903
2	51	1	1.68	64	22.6757	4	2	5	1	10	12.5	0.04	0.118	0.036	0.085	1.21	1.3962	0.06	0.067	0.035	0.04	1.7143	1.6862	0.05	0.059	0.043	0.046	1.1628	1.2826	0.053	0.059	0.049	0.052	1.0736	1.1421
2	38	2	1.65	52	19.1001	3	1	12	7	12.5	15	0.04	0.118	0.036	0.085	1.21	1.3962	0.06	0.075	0.045	0.049	1.3333	1.5458	0.046	0.046	0.041	0.039	1.122	1.1795	0.029	0.037	0.025	0.031	1.1361	1.1803
2	37	1	1.68	59	20.9042	6	2	8	4	12.5	15	0.04	0.053	0.048	0.055	0.9362	0.9768	0.038	0.05	0.034	0.04	1.1176	1.2498	0.046	0.059	0.059	0.061	0.7797	0.9672	0.039	0.05	0.032	0.037	1.219	1.3304
